# Supplementary material for: Building Research Capacity in the Global South: Insights from a Scientific Writing Workshop
Source: Research Square preprint supplement (doi:10.21203/rs.3.rs-7310084/v1), 2025-08-27
Supplement: Supplementary file 1 [file ad4582d53b041c6755fc307c.xlsx]

## Sheet: Sheet1
Table 5 Thematic Breakdown of the Main Suggestions to Improve the Workshop for Future Learners
Themes	Quotes
Increase Practical Components Many participants suggested more hands-on exercises, real-time feedback, and group-based writing activities to apply learned skills.	"Enhance Interactivity: Make the workshop more interactive by incorporating activities, discussions, and hands-on exercises." "A live demo of writing a scientific paper during the workshop would help."
Extend the Duration A strong call was made to increase the number of workshop days or hours to better absorb content and allow more practice.	"Extend the workshop to allow more time for practical exercises." “I suggest for the future workshops to provide enough time for learning. For example, two full days, instead of half-day.”
Incorporate Assessments and Assignments Participants suggested including pre- and post-workshop tasks to enhance engagement and measure progress.	“It would be better if trainees had small writings before and after training, so that you can track the improvement in tangible strategies.” "Pre and postworkshop assignments would make it more interactive." "Preworkshop assignments would help learners come prepared."
Increase Frequency of Workshops Several participants expressed a desire for the workshop to be conducted more frequently. They felt that more frequent workshops would allow for continued learning and would give more individuals the opportunity to participate.	"Have more frequent workshops so that more people can attend." "Offer this workshop annually to ensure continuous learning." "Scientific writing workshop was essential and productive for us as students who want to be passionate more in clinical research and scientific writing, I wish this workshop could be continued for upcoming years."
Offer Mentorship and Follow-up Some participants suggested providing mentorship opportunities or follow-up sessions to help guide learners in applying what they’ve learned. Mentorship could provide ongoing support and ensure learners continue to develop their skills postworkshop.	"Offer mentorship sessions for participants with draft manuscripts." "There should be a follow-up with those who took the course to see how they are applying what they learned." “I suggest we can have some research topic assigned to work on and we will be evaluated after for all criteria of paper publication and help us through the process of writing.”
Make Content More Inclusive Some participants noted that the examples used during the workshop were primarily from clinical fields. They suggested incorporating more diverse examples from fields such as public health, global health, and humanities, to make the content more accessible to a wider range of participants.	"Provide examples from other fields like humanities and social sciences." "Include examples from public health and global health literature." "It would be better for next time to use examples that are not so clinical and to be more diverse & inclusive in the content used."
Logistics and Accessibility A few participants raised concerns about internet access, physical attendance, or workshop timing.	“Next better to plan for physical attendance because some were not allowed to leave their respective jobs.” “Prepare in-person workshops so that the mentors can be there to help the participants in research writing exercises by doing lots of writing drafts.” “Plan after working hour so that the remote people also contribute effectively.” “Network issues during slide sharing was a bit distracting,…
